# Supplementary material
Source: PubMed Central journal article supplement (PMC6883776)
Supplement: pnas.1909183116.sapp.pdf [file pnas.1909183116.sapp.pdf]

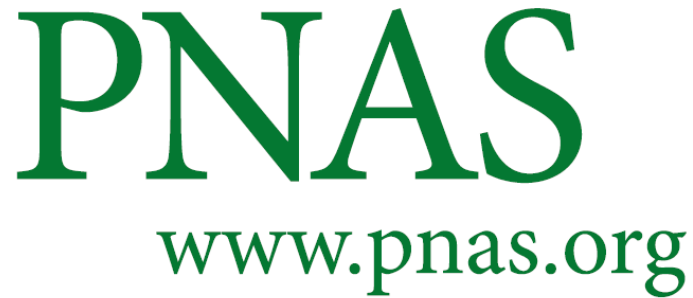

Supplementary Information for

**A DNA virus-encoded immune antagonist fully masks the potent antiviral activity of RNAi in *Drosophila***

Alfred W. Bronkhorst<sup>a,1,2</sup>, Rob Vogels<sup>a,1</sup>, Gijs J. Overheul<sup>a,1</sup>, Bas Pennings<sup>a,3</sup>, Valérie Gausson-Dorey<sup>b</sup>, Pascal Miesen<sup>a</sup>, Ronald P. van Rij<sup>a</sup>

<sup>a</sup>Department of Medical Microbiology, Radboud University Medical Center, Radboud Institute for Molecular Life Sciences, P.O. Box 9101, 6500 HB, Nijmegen, The Netherlands.

<sup>b</sup>Institut Pasteur, Viruses and RNA interference, CNRS URM 3569, 75724 Paris Cedex 15, France.

<sup>1</sup>These authors contributed equally to this study.

<sup>2</sup>Current affiliation: Institute of Molecular Biology, 55128 Mainz, Germany.

<sup>3</sup>Current affiliation: Khondrion, P.O. Box 9101, 6500 HB, Nijmegen, The Netherlands.

**Correspondence:** ronald.vanrij@radboudumc.nl

**This PDF file includes:**

- Supplementary text
- Supplementary Materials and Methods
- Figures S1 to S10
- Table S1
- SI References

## Supplementary Text

### Construction of mutant IIV6 $\Delta$ 340R

Recombinant IIV6 lacking 340R (IIV6  $\Delta$ 340R) was generated by homologous recombination. To this end, *Drosophila* S2 cells were transfected with a recombination template plasmid containing the GFP transgene fused to 14 N-terminal amino acids of 340R, flanked by homology arms at both the 5' and 3' ends (Fig. 1A). When transfected into non-infected cells, this plasmid did not express GFP, suggesting that the flanking sequences does not contain a functional promoter element or that viral proteins are required to activate the promoter region. However, GFP was readily detectable in IIV6 infected cells transfected with the recombination template plasmid. Transferring culture supernatant from these cells to naive uninfected cells again resulted in GFP expression, strongly suggesting that homologous recombination between IIV6 and the template plasmid has successfully occurred. The mutant virus was then purified away from the wildtype (WT) virus by repeated serial dilution on S2 cells. The 340R gene was indeed replaced by GFP in the mutant virus, as established by diagnostic PCR using primers flanking the recombination site and GFP specific primers (SI Appendix, Fig. S1 A, B) as well as by Sanger sequencing. Absence of WT virus in the mutant virus stock was verified by PCR using primers specific for 340R (SI Appendix, Fig. S1). We previously showed that IIV6 340R suppresses RNAi using reporter assays in cells in which 340R was expressed as a transgene or using cell-free biochemical assays in the presence of recombinant 340R (1). Using a Dicer assay in extracts from S2 cells infected with either WT or  $\Delta$ 340R mutant virus, we verified that 340R is responsible for suppression of RNAi in IIV6 infected cells (SI Appendix, Fig. S1C).

## Supplementary Material and methods

### Cells and virus

*Drosophila* S2 cells (Invitrogen) and DCV, CrPV and IIV6 were propagated as described (2, 3). Where indicated, UV inactivated IIV6 was used (2). IIV6 titers were determined by end-point dilution on S2, with cultures passaged at day 7, and visually inspected 5 days later (2). TCID<sub>50</sub> values were calculated according to the Reed and Muench method.

### Construction of mutant virus

To produce IIV6  $\Delta$ 340R, a donor template for homologous recombination was generated. The left homology arm (LHA), including the first 14 aa of the 340R coding sequence, amplified from DNA isolated from IIV6 infected S2 cells using primers WB304 and WB310 and ligated into *SacI* and *XmaI* digested pGEM3Z plasmid (Promega). The 340R right homology arm (RHA) was amplified using primers WB311 and WB305 and inserted into pGEM3Z-LHA using *XmaI* and *XbaI* restriction sites. Finally, the eGFP sequence was amplified using primers WB312 and WB313, and the amplicon was inserted into the pGEM3Z-LHA+RHA backbone plasmid using the *XmaI* restriction site. Colony PCR was used to confirm the correct orientation of the eGFP insertion. All individual plasmids were validated by Sanger sequencing.

S2 cells were seeded at a density of  $3.5 \times 10^5$  cells per well in a 24-well plate and transfected the next day with 0.5  $\mu$ g of recombination plasmid pGEM3Z-LHA-340R14-eGFP-RHA using Effectene Transfection Reagent (Qiagen). One day post transfection, cells were infected with IIV6 at an MOI of 1. The eGFP signal became visible at two days post infection and 100  $\mu$ L supernatant from eGFP positive wells was collected, passed through a 0.2  $\mu$ m syringe filter, and subjected to serial dilutions in a 96-well plate, in which S2 cells were seeded at a density of  $2.5 \times 10^4$  cells per well. Cells were scored for cytopathic effect (CPE) and GFP at 7 and 14 dpi and culture supernatant (of the highest dilution that scored positive) was harvested, filtered, and subjected to end-point dilution to eliminate WT virus that might remain present. The same procedure was performed for a third round after which absence of WT IIV6 was verified by PCR. A final round of selection by serial dilution was used to generate IIV6  $\Delta$ 340R, which was validated by a series of diagnostic PCRs using primers flanking, and internal to 340R and GFP (SI Appendix, SI Appendix, Fig. S1).

### Flies

50 nl of undiluted virus stock (IIV6 wildtype virus: titer  $6.34 \times 10^8$  TCID<sub>50</sub>/ml) or an equivalent of the 340R mutant virus was injected into the thorax of adult flies (4). The following genotypes were used: *w*<sup>1118</sup> wildtype control flies, *Dcr-2*<sup>L811fsX</sup> and *AGO2*<sup>414</sup> flies (5, 6). Three pools of five flies were harvested at indicated time points, frozen, and stored until processing. As insufficient numbers of homozygous miR-275-305 knockout (KO) flies (7) were obtained, trans-heterozygotes were generated by crossing miR-275-305 KO flies with *w*<sup>1118</sup> control flies or with flies carrying the *cuc*<sup>1</sup> P-element insertion (a miR-275-305 allele (7)) or the Df(2L)ED483 deficiency which deletes ~153 kb of DNA including the miR-275-305 cluster.

### Plasmids

Plasmids encoding RNAi suppressor proteins have been described previously (1, 3, 8, 9). To analyze the effect of viral RNAi suppressors on miRNA expression, S2 cells were seeded in a 6-well plate at a density of  $3.0 \times 10^6$  cells per well and transfected the next day with 1  $\mu$ g of plasmid using Effectene Transfection Reagent (Qiagen). Cells were harvested 3 days post transfection followed by RNA isolation for Northern blot analysis.

miR-305 reporters were made by cloning DNA oligonucleotides containing two fully complementary target sites for either miR-305-5p, miR-305-3p or a scrambled miR-305-3p sequence into the 3' UTR of pMT-GL3 that was digested by *SacII* and *PmeI*. The effect of IIV6 on miR-305 mediated silencing was analyzed by seeding  $5.0 \times 10^4$  S2 cells per well in a 96 wells plate and infecting them the next day with IIV6 WT or IIV6  $\Delta$ 340R at an MOI of 5. The cells were transfected 6 hours after infection using Effectene Transfection Reagent and were

harvested for luminescence measurements at 48 hpi (experiment 1) or 24 hpi using the Dual-Luciferase Reporter Assay System (Promega).

### **PCR.**

Cells were harvested by centrifugation for 5 min at 400 g, and pellets were resuspended in 200  $\mu$ L PBS, and treated with proteinase K. DNA was isolated using the DNeasy Blood & Tissue Kit (Qiagen) and PCRs were performed using Phusion Polymerase, according to the manufacturers' instructions.

Flies were homogenized in 180  $\mu$ L PBS, and DNA was isolated using the QIAamp DNA Blood Mini Kit. 30 ng of DNA was used as input for qPCR to quantify IIV6 DNA copies, using the GoTaq qPCR system (Promega) and primers for IIV6 161L (Figure 1B) and IIV6 193R (Figure 5) using rp49 as internal normalization control. Reactions were run on a Light Cycler 480 (Roche) and analyzed using the  $2^{-\Delta\Delta C_t}$  method. The day 0 sample was used as input to normalize the qPCR data.

### **Northern blot**

Northern blots were performed as described before (10). Where applicable, cells were transfected with dsRNA targeting Dcr-1 or as a control GFP. dsRNA was generated as described (11).  $\beta$ -elimination of total RNA was performed as described before (12), using the same RNA samples as used to prepare small RNA sequencing libraries. 10  $\mu$ g of RNA in 47.5  $\mu$ L nuclease-free water was oxidized by addition of 12.5  $\mu$ L 200 mM NaIO<sub>4</sub> and 40  $\mu$ L 5x borate buffer, followed by incubation at room temperature for 30 min. As a control, water was added to the RNA instead of NaIO<sub>4</sub>. The unreacted NaIO<sub>4</sub> was quenched by addition of 10  $\mu$ L glycerol and incubation at room temperature for another 10 min. To induce  $\beta$ -elimination, 10  $\mu$ L of 500 mM NaOH was added, followed by incubation at 45 °C for 90 min. The RNA was purified by ethanol precipitation and migration of small RNAs was analyzed by Northern blotting as describe before (10). Oligonucleotide sequences are provided in SI Appendix, Table S1.

### **Stemloop qRT-PCR**

Stemloop qRT-PCR assays were based on the method of (13), with adaptations. S2 cells were infected with IIV6 (WT or  $\Delta$ 340R) at an MOI of 1. RNA was isolated at 72 hpi using RNA-Solv reagent (Omega Biotek) and 100 ng was used as input for reverse transcription using SuperScript II Reverse Transcriptase (Thermo Scientific) and stemloop primers specific for miR-305-5p, miR-305-3p and U6. RNA oligonucleotides were used as standard curves for absolute quantification of miR-305-5p and miR-305-3p. A 10-fold dilution series of each RNA oligonucleotide was added to 100 ng RNA from HeLa cells, which do not express miR-305, and analyzed in parallel to IIV6 infected samples. qPCR was performed using the GoTaq qPCR system (Promega) with a universal primer detecting the stemloop and a primer specific to the miRNA or, as a normalization control, U6 RNA.

### **Dicer assay**

Dicer assay was performed as described before (2) in extracts from S2 cells infected with either IIV6 WT or  $\Delta$ 340R at an MOI of 1 (harvested at 2 dpi).

### **Electrophoretic mobility shift assay (EMSA)**

RNA oligonucleotides (Table S1) were ordered from Sigma-Aldrich. Recombinant proteins and EMSAs have been described previously (1). Signal intensity on the films was quantified using ImageJ. Kd values were determined by fitting association curves by non-linear regression (one-phase association) using GraphPad Prism, version 5.03.

### **Small RNA sequencing and analyses.**

S2 cells were infected with IIV6 WT or  $\Delta$ 340R mutant virus at an MOI of 1. RNA was isolated at 72 hpi using RNA-Solv reagent (Omega Biotek). The small RNAs were size selected by loading 25  $\mu$ g of total RNA on a 15% acrylamide/7M urea/0.5x TBE gel and excising the small RNAs ranging from 19-24 nt using radioactively labeled size markers, run in lanes flanking the

samples, as rulers. The RNA was purified from gel by overnight incubation in 0.3 M NaOAc, followed by ethanol precipitation. The pellet was dissolved in 11  $\mu$ l nuclease-free water, of which 5 $\mu$ l was used as input for small RNA library preparation using the TruSeq kit (Illumina) according to the manufacturer's recommendations. After the final PCR amplification, the libraries were size purified from a 6% acrylamide/1x TBE gel by overnight incubation in 0.3M NaOAc, and ethanol precipitation. The samples were quantified using the Agilent 2100 Bioanalyzer System and pooled libraries were sequenced in an Illumina HiSeq4000 machine by Plateforme GenomEast (Strasbourg, France).

For the analysis of viral small RNAs, clipped reads were mapped to the IIV6 genome (GenBank accession AF303741.1) or to specific IIV6 genes using Bowtie (Galaxy tool version 1.1.2) allowing 1 mismatch. Mapped reads were normalized to library size (expressed as reads per million, RPM) and to the average of four viral transcripts (193R, 205R, 206R and 251L, relative transcript levels measured by qRT-PCR). For the genome distribution, the number of 5' ends of all vsRNAs at each position were plotted. miRNA levels were analyzed by mapping the clipped reads to the *Drosophila* genome (dm6 build; GCA\_000001215.4) without allowing mismatches. The genome coordinates for mature miRNAs (dme.gff3 coordinates from miRbase on dm6 build) were intersected with the mapped reads to find all mature miRNAs in the datasets (using bedtools intersect intervals version 2.27.0; -wa).

The miRNA heat map was based on all mature microRNA sequences with a minimal normalized count of 100 reads per million in the sum of all libraries. For hierarchical clustering of miRNAs, the mean expression level of uninfected, IIV6 WT and  $\Delta$ 340R virus infected S2 cells were determined. Then fold changes of infected libraries compared to the uninfected control were calculated, log<sub>2</sub> transformed and used as input for multiple experiment viewer (MEV version 4.9.0, Tm4) (14). An average linkage clustering was performed using Pearson Correlation with 'gene tree' and 'optimize gene leaf order' enabled. The heat map was generated with Microsoft Excel 2010 using the conditional formatting tool. The log<sub>2</sub> transformed fold change of individual libraries compared to the mean of the uninfected libraries was used as input. Individual microRNAs were sorted according to the output of the MEV clustering.

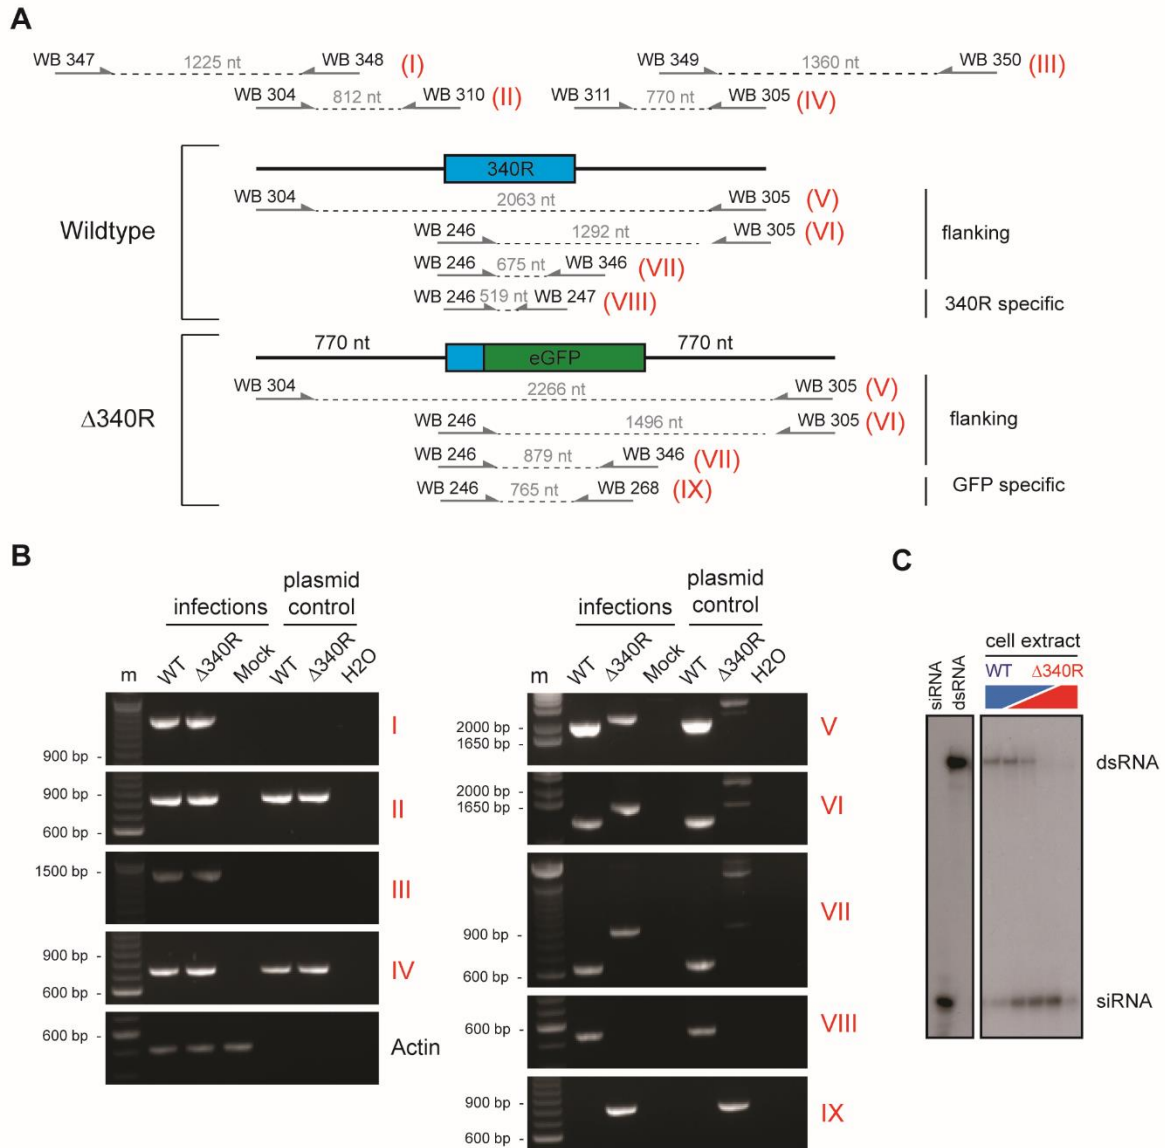

**Fig. S1. Characterization of IIV6  $\Delta$ 340R mutant virus.**

(A) Overview of the primers used for PCR-based characterization of IIV6  $\Delta$ 340R mutant virus. Indicated are the relative positions and expected sizes of the PCR products. (B) PCR to validate the accuracy of homologous recombination and to verify absence of wildtype (WT) virus in the IIV6  $\Delta$ 340R virus stock. PCR was performed on DNA of S2 cells infected with the indicated virus stocks at 3 dpi. Both a 340R-WT plasmid containing left and right homology arms as well as the final  $\Delta$ 340R-eGFP recombination plasmid served as template controls. M, size marker with selected sizes indicated. (C) Dicer assay in extracts of S2 cells infected with IIV6 WT or  $\Delta$ 340R. Cells were infected with the indicated viruses at an MOI of 1.0 and cell extract was prepared at 2 dpi. Processing of synthetic, radiolabelled dsRNA into siRNAs was analyzed on a 12% denaturing polyacrylamide gel. The dsRNA substrate and synthetic, radiolabelled siRNAs were run alongside as size markers at different locations of the same gel.

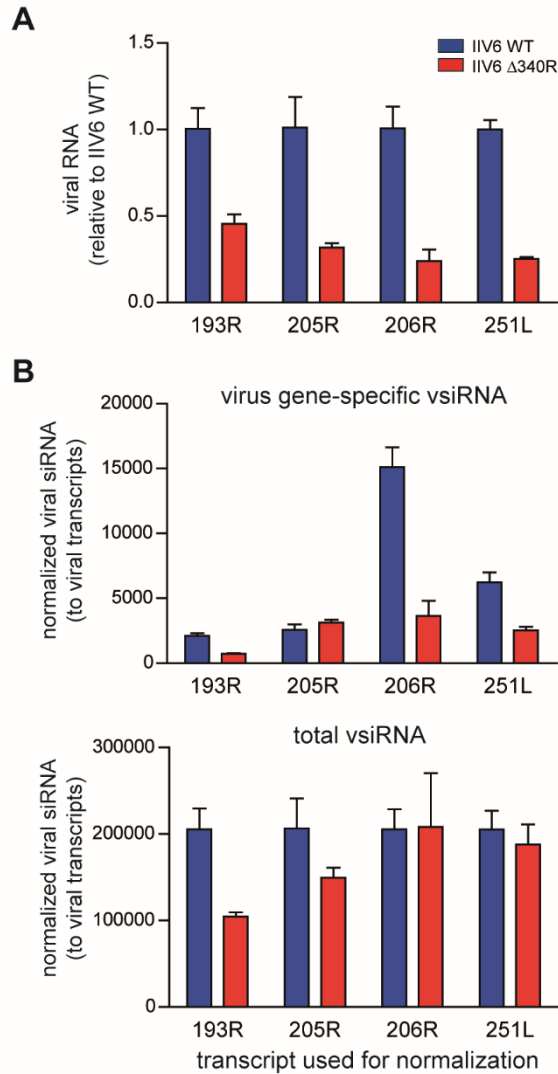

**Fig. S2. vsiRNA levels normalized to transcript levels of four individual IIV6 genes.**

(A) Transcript levels of four viral genes in the samples used to prepare sequencing libraries, assessed by RT-qPCR. Data are normalized to the house-keeping gene rp49 and expressed relative to IIV6 WT infection (blue bars, means  $\pm$  SD of three biological replicates). (B) Number of vsiRNAs from specific viral genes (top panel) or total vsiRNAs (lower panel), normalized to library size and to the transcript levels of the indicated viral genes from A (mean  $\pm$  SD of three biological replicates).

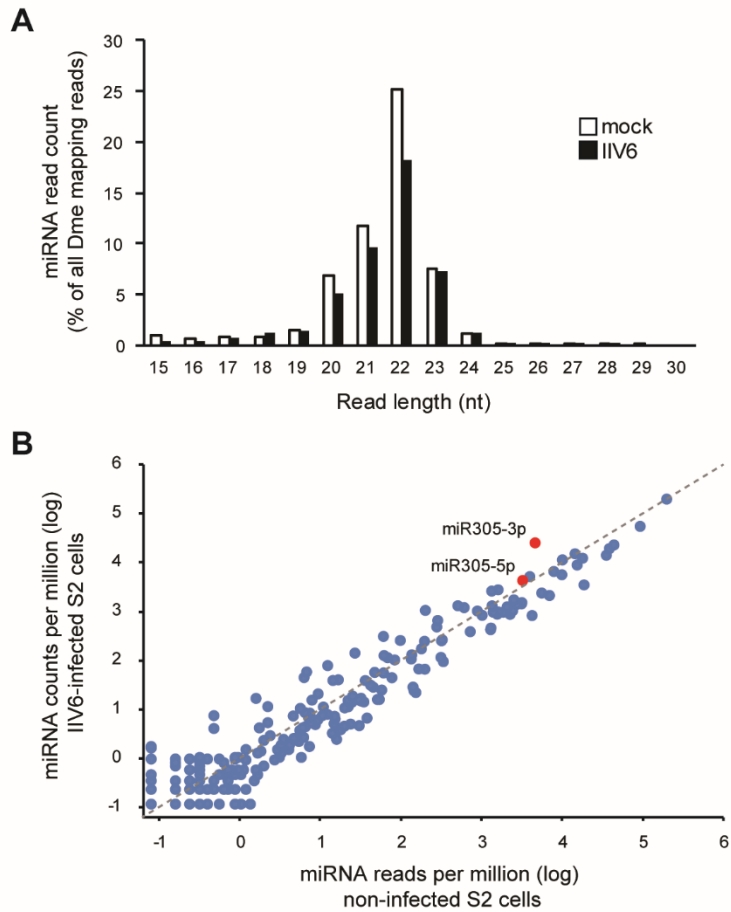

**Fig. S3: miRNA levels in IIV6 infected *Drosophila* S2 cells from Kemp *et al* (15).**

(A) miRNA read counts in non-infected and IIV6 infected S2 cells. Small RNA reads were mapped to the *Drosophila* genome, intersected with the position of pre-microRNAs, and plotted according to their size. (B) As for (A), but genome-mapped small RNAs were intersected with the positions of mature microRNAs. For individual miRNAs, the normalized read counts (per million mapped reads) in non-infected and IIV6 infected cells were plotted. miR-305-5p and 3p are indicated by red symbols. The dashed diagonal line reflects equal read counts in non-infected and IIV-6 infected cells.



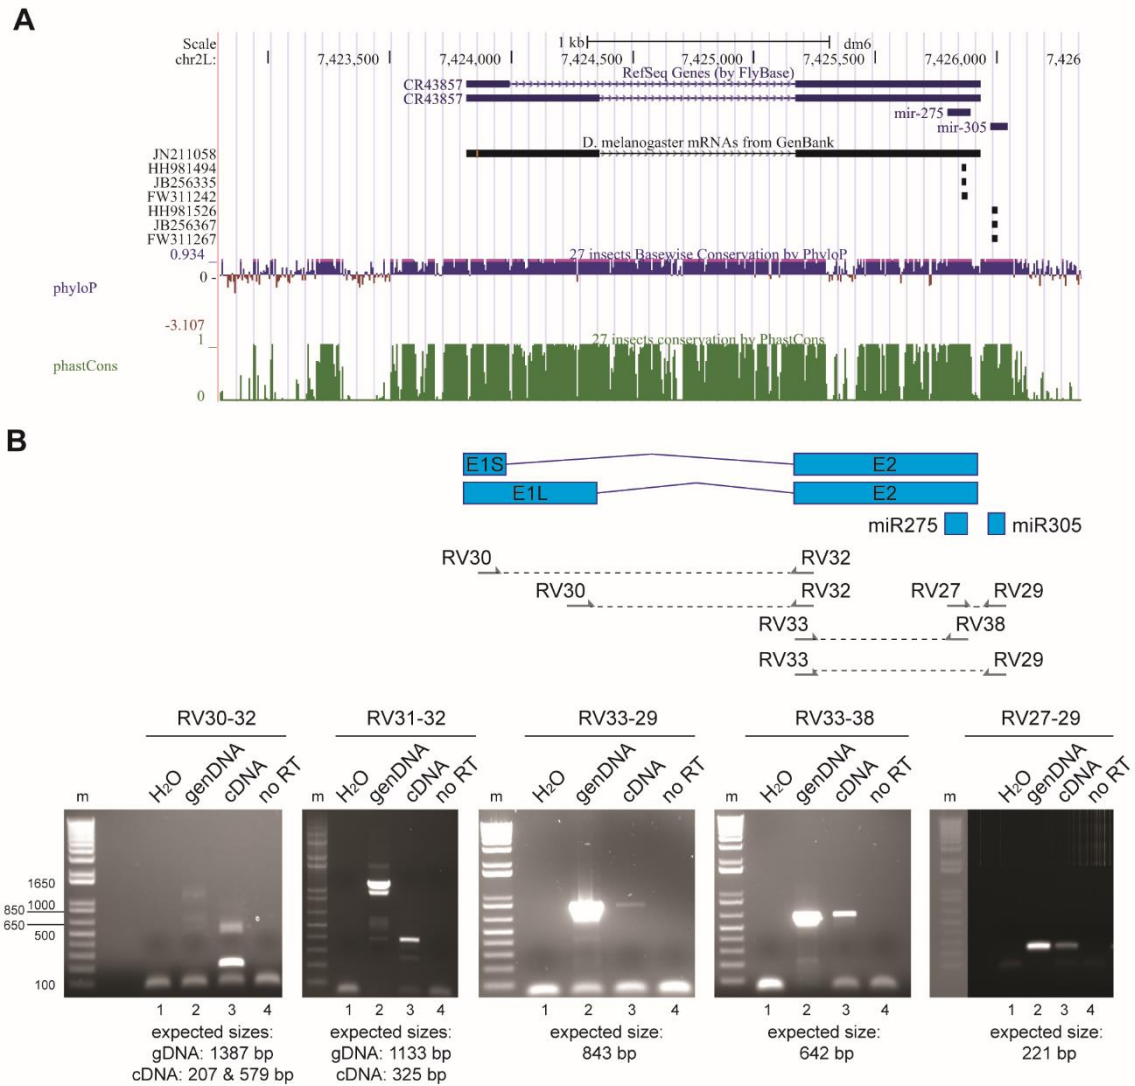

**Fig. S4. Organization of miR-275-305 precursor locus.**

(A) Genome browser screenshot of the miR-275-305 locus. (B) PCR analyses of the miRNA locus on genomic DNA (genDNA), cDNA from *w*<sup>1118</sup> adult flies. Reactions in absence of reverse transcriptase (no RT) are included to verify absence of DNA contamination in RNA preparations. Locations of the primers are drawn schematically. M, size marker (1kb plus). The marker on agarose gel RV27-29 is a higher exposure from the same gel. Although miR-275 clearly overlaps with non-coding transcript CR43857, the genome assembly is ambiguous as to whether miR-305 is part of this transcript. RT-PCR analyses verified that miR-275 and miR-305 are indeed expressed from a single transcript.

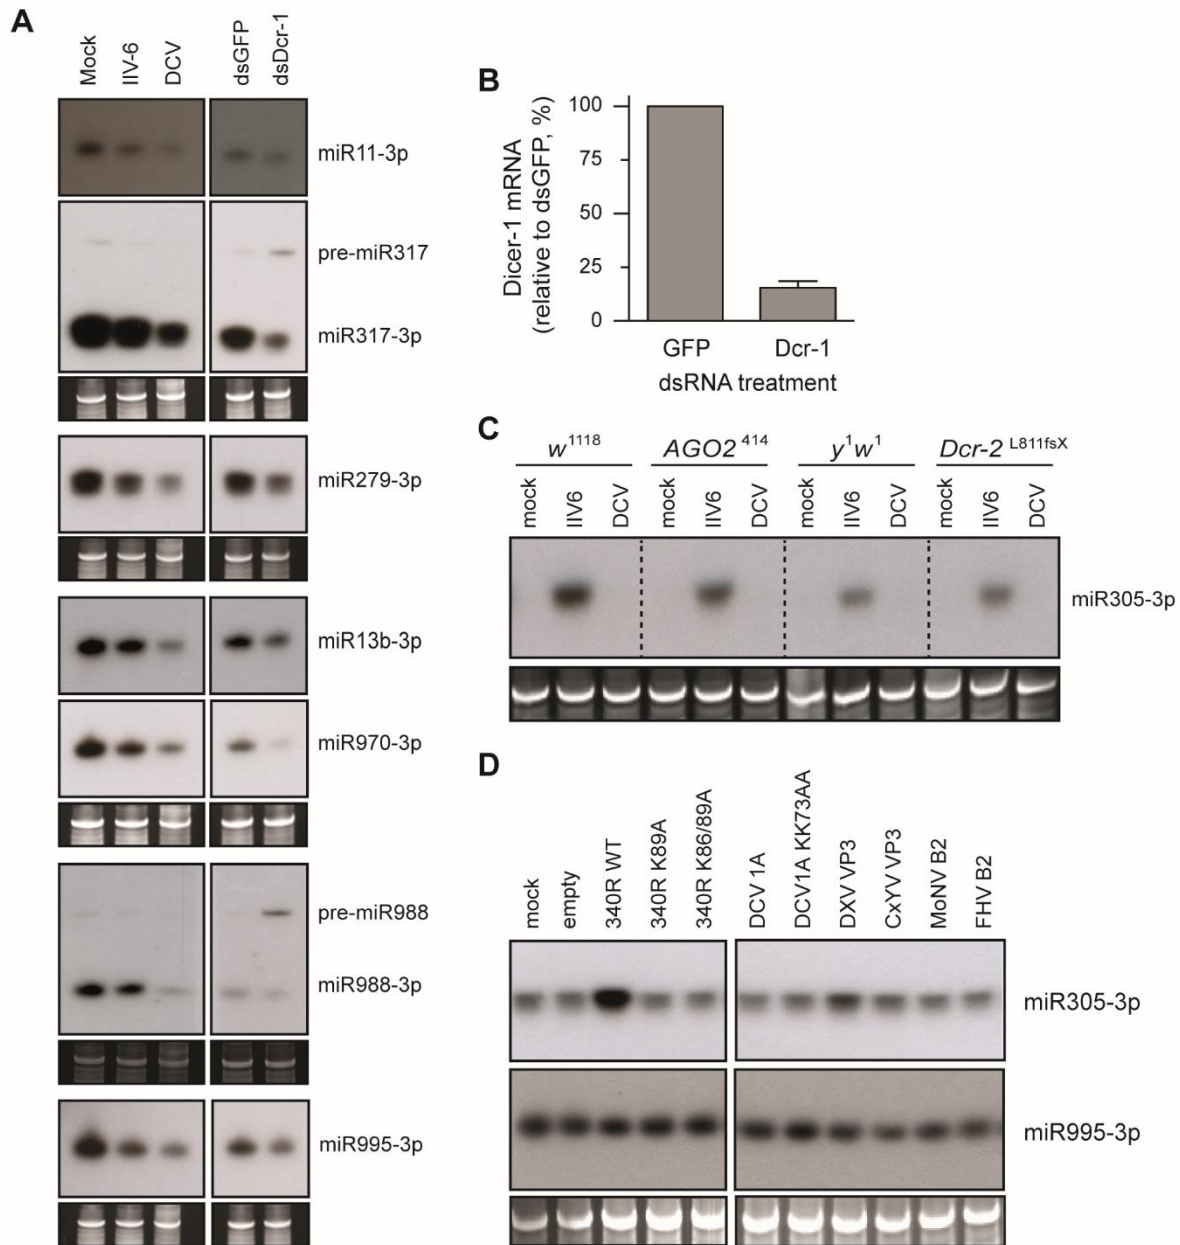

**Fig. S5. IIV6 induces miR305-3p in an RNAi independent manner.**

(A) Northern blots of selected miRNAs during *Drosophila* C virus (DCV) and IIV6 infection of *Drosophila* S2 cells at 3 days post infection. As controls, non-infected cells treated with dsRNA targeting Dicer-1 (dsDcr-1) or GFP (dsGFP, control) were run on the same gel. Ethidium bromide stained rRNA was used as a loading control. The miR-279-3p image was obtained by re-probing the miR-275-3p blot (Fig. 3B); for clarity the ribosomal RNA image is shown here again. The miR-11-3p image was obtained by re-probing the miR-317-3p blot, and the miR-13b-3p image by re-probing the miR-970-3p blot. (B) Quantification of Dicer-1 mRNA in S2 cells treated with dsRNA targeting GFP or Dicer-1, used for the northern blots in (A). Data are normalized to rp49 and expressed relative to GFP dsRNA-treated cells. Bars are means and SD of 2 biological replicates. (C) Northern blot analysis of miR-305-3p in wildtype control flies (*w*<sup>1118</sup> and *y*<sup>1</sup>*w*<sup>1</sup>) and RNAi mutant flies with the indicated genotypes at 3 dpi. (D) Northern blot of miR-305-3p and miR-995-3p in S2 cells transfected with expression plasmids encoding the indicated viral suppressors of RNAi. For IIV6 340R and DCV 1A, mutants in the double-stranded RNA binding domain were included. Cells were harvested at 3 days after transfection and analyzed by northern blot. The panels are split to reflect that the samples were loaded at different locations of the same gel.

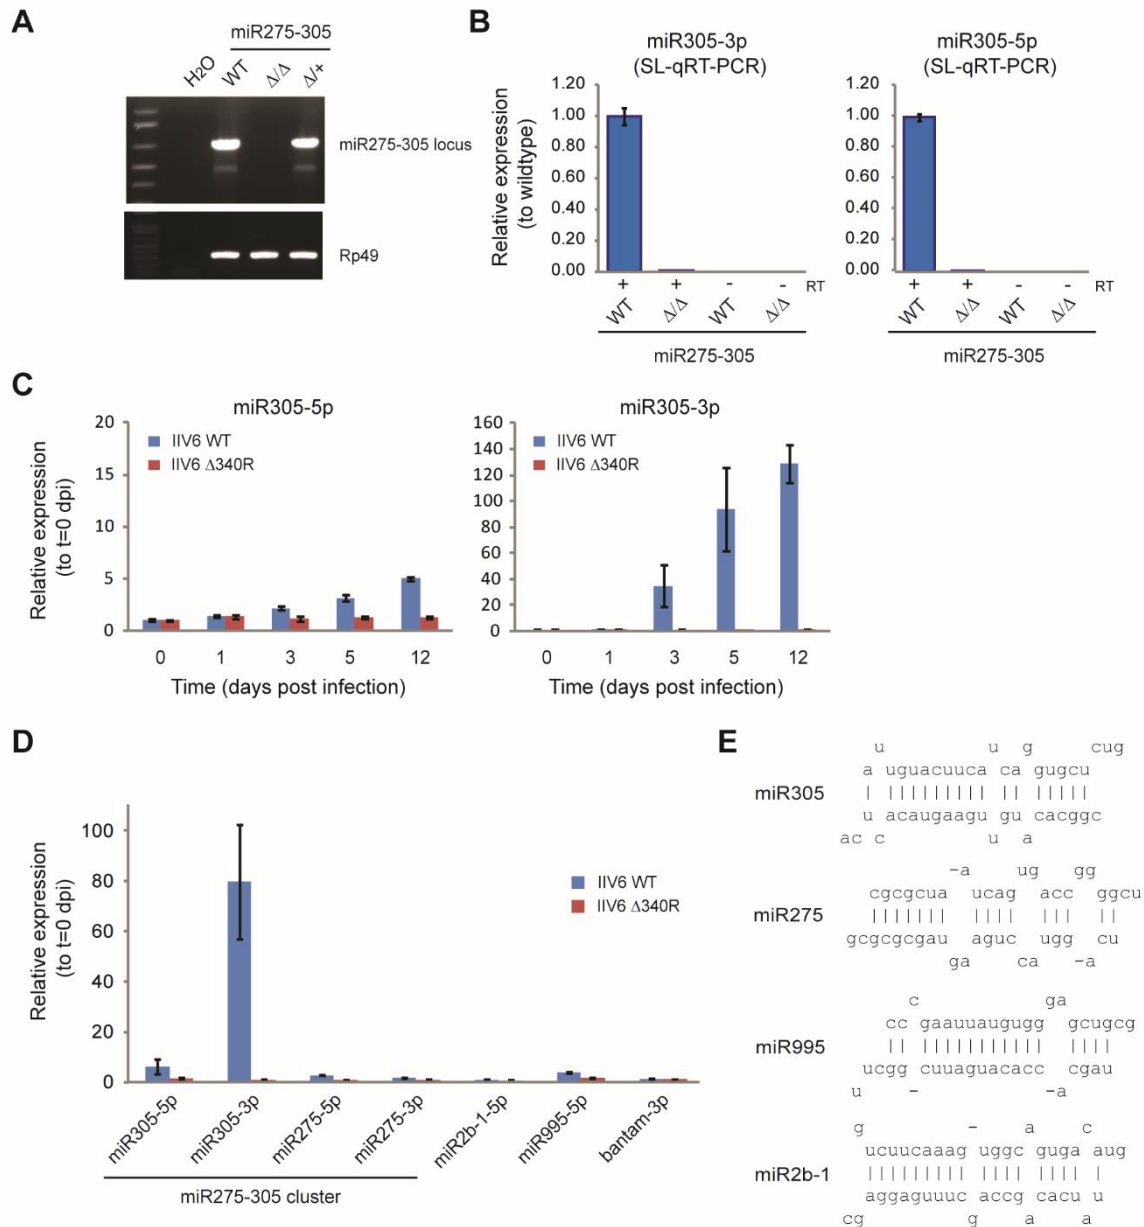

**Fig. S6. Quantification of miRNAs by stemloop qRT-PCR in wildtype and  $\Delta 340R$  mutant IIV6 infected cells.** (A) PCR analysis of the miR-275-305 locus in wildtype (WT,  $w^{1118}$ ) flies and flies heterozygous ( $\Delta/+$ ) and homozygous ( $\Delta/\Delta$ ) for a deletion of the miR-275-305 locus (7). rp49 was used as an internal control. (B) Validation of stemloop (SL)-qRT-PCR assays for miR-305-3p (left panel) and 5p (right panel) on WT flies (genotype  $w^{1118}$ ) and flies deficient for the miR-275-305 locus ( $\Delta/\Delta$ ). Data are normalized to WT flies for each miRNA. Data represent means and SD of 2 replicates of 5 pooled flies. (C) miR-305-5p (left panel), miR-305-3p (right panel), and U6 snRNA were quantified by SL-qRT-PCR in three pools of 5  $w^{1118}$  flies infected with IIV6 WT or  $\Delta 340R$ , harvested at the indicated time points. Data were normalized to U6 snRNA and expressed relative to  $t=0$  dpi. (D) Multiplex SL-qRT-PCR for the clustered miR-275 and miR-305 and the indicated miRNAs at 12 dpi. Data are means and SD from three pools of 5  $w^{1118}$  flies. Data are expressed relative to  $t=0$  for each miRNA. (E) Sequence and predicted structure of 5p:3p duplexes of miR-305, miR-275, miR-995, and miR-2b-1, used in gel shift assays of Figure 4.

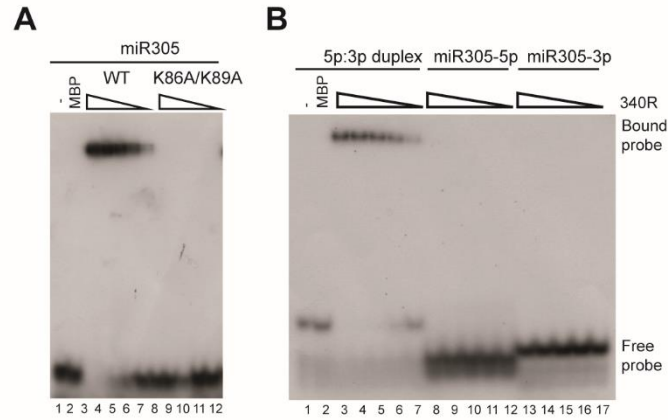

**Fig. S7. IIV6 340R binds miR305 duplexes, but not mature single-stranded miRNAs, in a dsRNA-binding domain dependent manner.**

(A) Electrophoretic mobility shift assay (EMSA) of miR-305 duplex with 340R WT (lanes 3-7) and 340R K87A/K89A mutant (lanes 8-12; less sample had been loaded in lane 10). (B) EMSA of miR-305 5p:3p duplex (lanes 1-7), miR-305-5p (lanes 8-12), and miR-305-3p (lanes 13-17) with 340R WT. Two-fold dilutions of recombinant protein were tested, starting from a concentration of 3.2  $\mu$ M. Incubations in buffer only (-) and MBP were included as controls, as indicated.

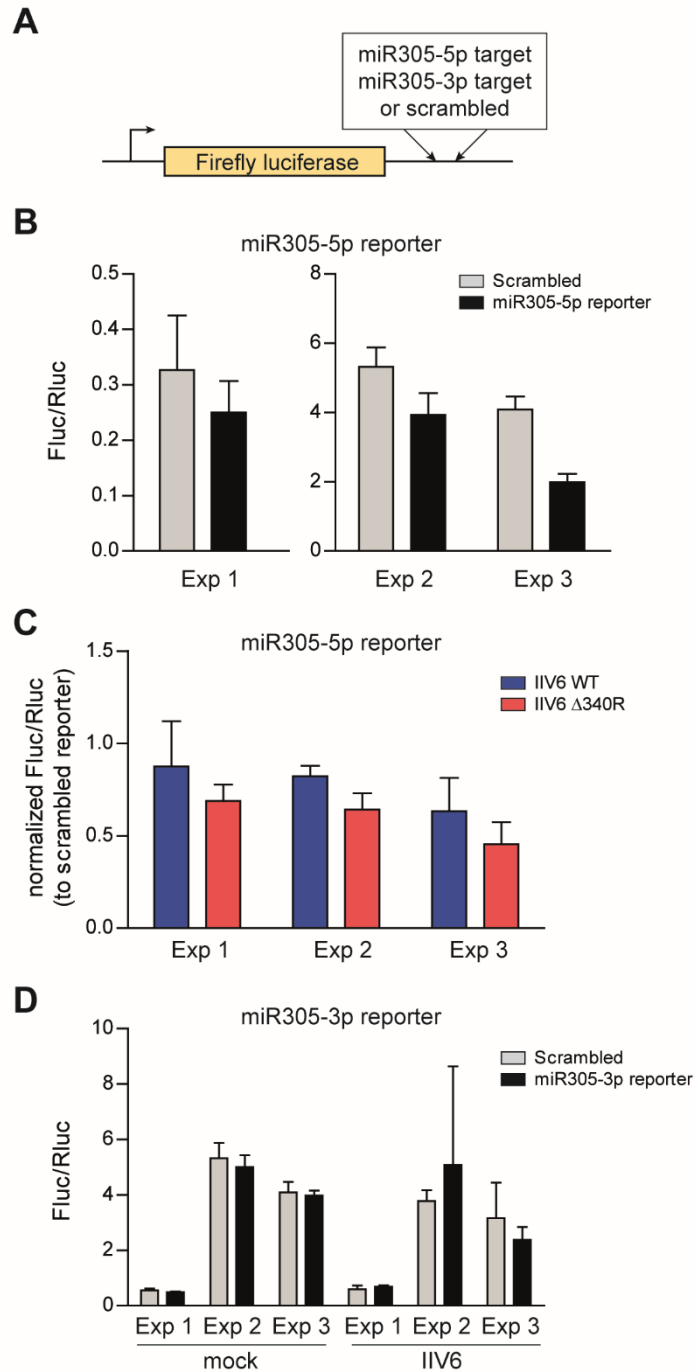

**Fig. S8. IIV6 infection affects miRNA function in a 340R dependent manner.**

(A) Schematic representation of miRNA reporters. Two perfectly complementary target sites were introduced into the 3' untranslated region of the firefly luciferase (Fluc) reporter gene. A plasmid encoding *Renilla* luciferase (Rluc) was included as normalization control. (B-D) Fluc over Rluc ratios in cells transfected with the indicated reporters in non-infected *Drosophila* S2 cells (mock) or cells infected IIV6 WT or  $\Delta$ 340R, as indicated. Data from three independent experiments (Exp 1-3) are presented, each experiment performed in three replicate wells. Means and SD are presented. Experiment 1 was harvested at 48 hpi, experiments 2 and 3 at 24 hpi. Data in (C) are normalized to the reporter with the scrambled target site. The difference in miR-305-5p activity between IIV6 WT and  $\Delta$ 340R infected cells was analyzed using a paired Student's *t*-test on the means of each experiment ( $P < 0.001$ ).

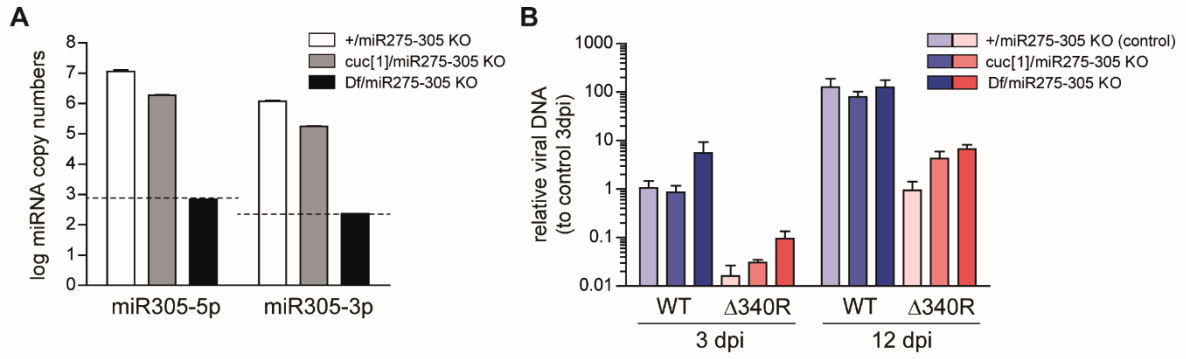

**Fig. S9. IIV6 infection in flies lacking the miR-275-305 cluster.**

**(A)** Quantification of miR305-5p and 3p in trans-heterozygous offspring of crosses of miR-275-305 knockout (KO) flies with wildtype flies (+, genotype  $w^{118}$ ), or flies carrying the miR-275-305 allele *cuc*<sup>1</sup> or the Df(2L)ED483 deficiency spanning the miR275-305 locus. Horizontal dashed lines indicate the detection limit for each miRNA. Means of 2 pools of 10 flies are presented. **(B)** IIV6 viral DNA quantification in flies with the indicated genotypes infected with IIV6 WT or  $\Delta$ 340R at 3 and 12 dpi. qPCR data were normalized to the housekeeping gene *rp49* and presented relative to the control cross infected with IIV6 WT at 3dpi. Means and SD of 3 pools of 5 female flies are presented.

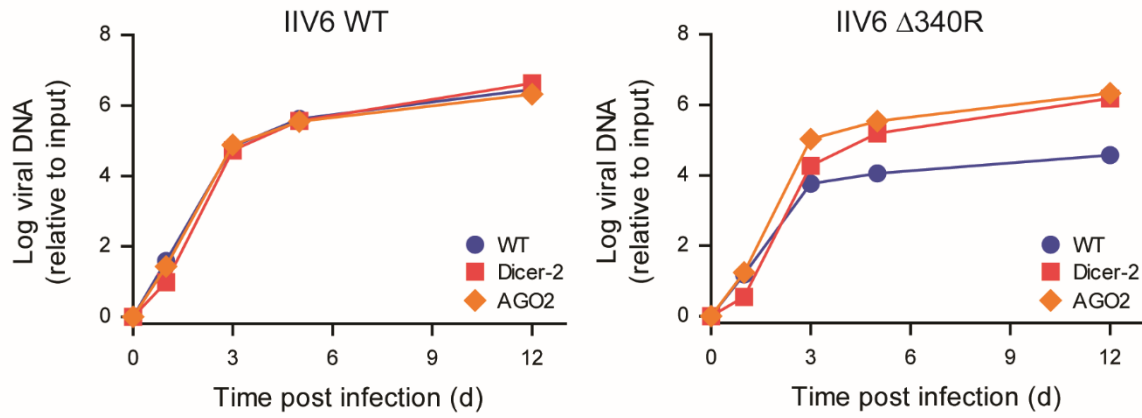

**Fig. S10.** Replication kinetics of IIV6 WT and  $\Delta 340R$  in wildtype ( $w^{1118}$ ), *Dicer-2*, and *AGO2* mutant flies. The same data as presented in Fig. 5B were plotted, but now grouped by virus genotype. qPCR data were normalized to the housekeeping gene *rp49* and presented relative to a sample taken directly after inoculation (input). The data were log transformed and presented as means and SD of three biological replicates of 5 flies.

## Supplemental table 1. Oligonucleotide sequences

### Template generation and diagnostic PCR for IIV6 $\Delta$ 340R (restriction sites underlined)

| Code  | Name                             | Sequence (5' - 3')                                         |
|-------|----------------------------------|------------------------------------------------------------|
| WB246 | ORF 340R Fwd (XbaI)              | AGTTCTAG <u>Aaac</u> ATGGAAAAACAAAAAGATAACGTA <u>ACTTC</u> |
| WB247 | ORF 340R Rev (XbaI)              | GGTTCTAGAAATATCGTCTATATCAACAGAGTCTTC                       |
| WB268 | eGFP Rev (NotI)                  | GGTGCGGCCGCTTACTTGTACAGCTCGTCCATGC                         |
| WB304 | pGEM-3Z_ORF340R_UD (SacI) Fwd    | AGTGAGCTCGCAGCCCATGCCCTGCATC                               |
| WB305 | pGEM-3Z_ORF340R_UD (XbaI) Rev    | GGTTCTAGAGCATCTTTTGAAGAAAGCTTTG                            |
| WB310 | pGEM-3Z_Up+ORF340R_14 (XmaI) Rev | GGTCCCGGGCTCTTCTTTAGTAGAAGTTACGTTATCTTTTTG                 |
| WB311 | pGEM-3Z_Do-ORF340R_14 (XmaI) Fwd | AGTCCCGGGAATTTTTAATGACGTATCATTA <del>AAAA</del> TTTTATTC   |
| WB312 | GFP (XmaI) Fwd                   | AGTCCCGGGGTGAGCAAGGGCGAGGAGC                               |
| WB313 | GFP (XmaI) Rev                   | GGTCCCGGGTTACTTGTACAGCTCGTCCATGCC                          |
| WB346 | 340R-D                           | GAAAAATTGTGGTTATTAAGTCGAATATCTGC                           |
| WB347 | ORF 337L-Rev                     | GTCTTGATGATGAAGGAAGTAGATGC                                 |
| WB348 | ORF 335L-Fwd                     | GACCGGCTTAATTGTCATATCTATAAG                                |
| WB349 | ORF 344R-Fwd                     | GAAGCTGAAACACCAGTGAAAGG                                    |
| WB350 | ORF 346R-Rev                     | CGATTCATCATTA <del>AAAA</del> TATATTTTTCGA                 |
| RVR88 | Actin42A-19 Fwd                  | GCGTCGGTCAATTCAATCTT                                       |
| RVR89 | Actin42A-386 Rev                 | CTTCTCCATGTGTCGCCAGT                                       |

### qPCR

| Code   | Name                  | Sequence (5' - 3')         | Reference |
|--------|-----------------------|----------------------------|-----------|
| WB100  | IIV6 65880 Fwd (161L) | CCATCGGATCTGTATGATGTTGCAC  |           |
| WB101  | IIV6 65999 Rev (161L) | TGGCACTGTTATTGTAGATGAGGT   |           |
| WB102  | IIV6 82935 Fwd (193R) | CACAACCAAGATTTGGATCACAACCA |           |
| WB103  | IIV6 83069 Rev (193R) | ACACGAAGAATGACCACAAGGA     |           |
| RVR105 | Dcr1-Fwd              | TCCATCTCCCAGTTTTACCG       |           |
| RVR106 | Dcr1-Rev              | GTCCCGCATCGATATCATCT       |           |
| RVR129 | Rp49 Fwd (RpL32)      | ATGACCATCCGCCAGCATAAC      | (16)      |
| RVR130 | Rp49 Rev (RpL32)      | CTGCATGAGCAGGACCTCCA       | (16)      |

### Primers to generate T7-flanked templates for in vitro transcription

| Code  | Name            | Sequence (5' - 3')                             |
|-------|-----------------|------------------------------------------------|
| RVR5  | T7-dmDCR1 A Fwd | TAATACGACTCACTATAGGGAGACTATCTCAGTTGCGAGGTTGG   |
| RVR6  | T7-dmDCR1 A Rev | TAATACGACTCACTATAGGGAGAGGGTATGTCTTTTCAGTTCGTCC |
| RVR19 | T7-GFP 125 Fwd  | TAATACGACTCACTATAGGGAGAAGCTGACCCTGAAGTTCATCTG  |



|       |                |                                              |
|-------|----------------|----------------------------------------------|
| RVR20 | T7-GFP 561 Rev | TAATACGACTCACTATAGGGAGAGGTGTTCTGCTGGTAGTGGTC |
|-------|----------------|----------------------------------------------|

### Probes for northern blots

| Code   | Name                        | Sequence (5' - 3')        |
|--------|-----------------------------|---------------------------|
| WB325  | miR995-3p                   | AAGCCGAATCATGTGGTGCTA     |
| WB326  | miR279-3p                   | TTAATGAGTGTGGATCTAGTCA    |
| WB328  | miR988-3p                   | GCGTGAGGTTTGCAACAAGGGG    |
| WB329  | miR317-3p                   | ACTGGATAACCACCAGCTGTGTTCA |
| WB330  | miR970-3p                   | ATAGCCGCGTGTGTCTTATGA     |
| WB333  | miR305-3p                   | TGAGTGTACTTCAACATGTGCCG   |
| WB334  | miR305-5p                   | CAGAGCACCTGATGAAGTACAAT   |
| WB336  | miR11-3p                    | GCAAGAACTCAGACTGTGATG     |
| WB351  | miR275-3p                   | CGCGCGCTACTTCAGGTACCTGA   |
| WB352  | miR13b-3p                   | ACTCGTCAAAATGGCTGTGATA    |
| GO-690 | IIV6 siRNA probe (-) 196578 | AGTTTGCCGATCCTGTATGTA     |
| GO-691 | IIV6 siRNA probe (-) 91868  | ATATTCAAATACCCGACCTCG     |

### miR275-miR305 locus

| Code | Name       | Sequence (5' - 3')    |
|------|------------|-----------------------|
| RV27 | miR275-Fwd | CTTGCGCGCTAATCAGTGAC  |
| RV29 | miR305-rev | TTCAACATGTGCCGGGTAC   |
| RV30 | E1S-Fwd    | GTCGTTTCGTTTCGCACCAAA |
| RV31 | E1L-Fwd    | TCAACGTGGTTTCTGGAGCT  |
| RV32 | E2-rev     | TTCGGAGCGTAGTATTGGCC  |
| RV33 | E2-Fwd     | TATCAAGGGTCTGCCGAACG  |
| RV38 | miR275-rev | GTCACTGATTAGCGCGCAAG  |

### Stemloop qPCR

| Code       | Name          | Sequence (5' - 3')                                 |
|------------|---------------|----------------------------------------------------|
| RV048/BP56 | SL miR305-5p  | GTCGTATCCAGTGCAGGGTCCGAGGTATTCGCACTGGATACGACCAGAGC |
| RV050/BP54 | SL miR305-3p  | GTCGTATCCAGTGCAGGGTCCGAGGTATTCGCACTGGATACGACTGAGTG |
| RV056      | SL U6 snRNA   | GTCGTATCCAGTGCAGGGTCCGAGGTATTCGCACTGGATACGACAAAAAT |
| RV052      | SL miR275-5p  | GTCGTATCCAGTGCAGGGTCCGAGGTATTCGCACTGGATACGACAGCCCC |
| RV054      | SL miR275-3p  | GTCGTATCCAGTGCAGGGTCCGAGGTATTCGCACTGGATACGACCGCGCG |
| RV058      | SL miR2b-1-5p | GTCGTATCCAGTGCAGGGTCCGAGGTATTCGCACTGGATACGACCATGTC |
| RV060      | SL miR995-5p  | GTCGTATCCAGTGCAGGGTCCGAGGTATTCGCACTGGATACGACCGCAGC |
| PM324      | SL-bantam-3p  | GTCGTATCCAGTGCAGGGTCCGAGGTATTCGCACTGGATACGACATCAGC |

|             |                |                         |
|-------------|----------------|-------------------------|
| RV049       | F-miR305-5p    | CGGCGCATTGTACTTCATCAGGT |
| RV051       | F-miR305-3p    | CGGAATCGGCACATGTTGAAGTA |
| RV068       | F-U6 snRNA     | CGCAAAATCGTGAAGCGTTC    |
| RV053       | F-miR275-5p    | CGGAATCGCGCTAATCAGTGACC |
| RV055       | F-miR275-3p    | CGGCGCTCAGGTACCTGAAGTAG |
| RV059       | F-miR2b-1-5p   | CGGAATGTCTTCAAAGTGGCAGT |
| RV061       | F-miR995-5p    | CGGAATCCCGAATTATGTGGGAG |
| PM325       | F-bantam-3p    | GCCCGCTGAGATCATTTTAAAAG |
| RV065/PM323 | R-univ-SL-qPCR | GTGCAGGGTCCGAGGT        |

### RNA oligonucleotides

| Name       | Sequence (5' - 3')      |
|------------|-------------------------|
| miR305-5p  | AUUGUACUUCAUCAGGUGCUCUG |
| miR305-3p  | CGGCACAUGUUGAAGUACACUCA |
| miR995-5p  | CCCGAAUUAUGUGGGAGCUGCG  |
| miR995-3p  | UAGCACCACAUGAUUCGGCUU   |
| siR-305-5p | AGUGUACUUCAACAUGGCCGUG  |
| siR-305-3p | GAGCACCUGAUGAAGUACAAUCA |

### miR-305 reporters

| Code   | Name                           | Sequence (5' - 3')                                                                |
|--------|--------------------------------|-----------------------------------------------------------------------------------|
| GO-693 | scrambled miRNA target site Fw | AATGACCGCTAACGTGGTACCTGTAATGTCTGACCCTGCGAGCTAACGTGGTACCTGTAATGTCCC GCGGCTGCGTTT   |
| GO-694 | scrambled miRNA target site Rv | AAACGCAGCCGCGGGACATTACAGGTACCACGTTAGCTCGCAGGGTCAGACATTACAGGTACCACGTTAGCGGTCATTGC  |
| GO-695 | Dme-miR-305-3p target site Fw  | AATGACCTGAGTGTACTTCAACATGTGCCGTGACCCTGCGATGAGTGTACTTCAACATGTGCCGCCGCGGCTGCGTTT    |
| GO-696 | Dme-miR-305-3p target site Rv  | AAACGCAGCCGCGGGCAGCATGTTGAAGTACACTCATCGCAGGGTCACGGCACATGTTGAAGTACACTCAGGTCATTGC   |
| GO-697 | Dme-miR-305-5p target site Fw  | AATGACCCAGAGCACCTGATGAAGTACAATTGACCCTGCGACAGAGCACCTGATGAAGTACAATCCGCGGCTGCGTTT    |
| GO-698 | Dme-miR-305-5p target site Rv  | AAACGCAGCCGCGGATTGTACTTCATCAGGTGCTCTGTGCGCAGGGTCAATTGTACTTCATCAGGTGCTCTGGGTCATTGC |

## Supplemental References

1. A. W. Bronkhorst, K. W. van Cleef, H. Venselaar, R. P. van Rij, A dsRNA-binding protein of a complex invertebrate DNA virus suppresses the Drosophila RNAi response. *Nucleic Acids Res* **42**, 12237-12248 (2014).
2. A. W. Bronkhorst, *et al.*, The DNA virus Invertebrate iridescent virus 6 is a target of the Drosophila RNAi machinery. *Proc Natl Acad Sci U S A* **109**, E3604-3613 (2012).
3. R. P. Van Rij, *et al.*, The RNA silencing endonuclease Argonaute 2 mediates specific antiviral immunity in Drosophila melanogaster. *Genes Dev* **20**, 2985-2995 (2006).
4. S. H. Merklings, R. P. van Rij, Analysis of resistance and tolerance to virus infection in Drosophila. *Nature protocols* **10**, 1084-1097 (2015).
5. K. Okamura, A. Ishizuka, H. Siomi, M. C. Siomi, Distinct roles for Argonaute proteins in small RNA-directed RNA cleavage pathways. *Genes Dev* **18**, 1655-1666 (2004).
6. Y. S. Lee, *et al.*, Distinct roles for Drosophila Dicer-1 and Dicer-2 in the siRNA/miRNA silencing pathways. *Cell* **117**, 69-81 (2004).
7. D. Foronda, R. Weng, P. Verma, Y. W. Chen, S. M. Cohen, Coordination of insulin and Notch pathway activities by microRNA miR-305 mediates adaptive homeostasis in the intestinal stem cells of the Drosophila gut. *Genes Dev* **28**, 2421-2431 (2014).
8. K. W. van Cleef, *et al.*, Mosquito and Drosophila entomobirnaviruses suppress dsRNA- and siRNA-induced RNAi. *Nucleic Acids Res* **42**, 8732-8744 (2014).
9. S. Schuster, *et al.*, A unique nodavirus with novel features: mosinivirus expresses two subgenomic RNAs, a capsid gene of unknown origin, and a suppressor of the antiviral RNA interference pathway. *J Virol* **88**, 13447-13459 (2014).
10. P. Miesen, E. Girardi, R. P. van Rij, Distinct sets of PIWI proteins produce arbovirus and transposon-derived piRNAs in Aedes aegypti mosquito cells. *Nucleic Acids Res* **43**, 6545-6556 (2015).
11. K. W. van Cleef, J. T. van Mierlo, M. van den Beek, R. P. Van Rij, Identification of viral suppressors of RNAi by a reporter assay in Drosophila S2 cell culture. *Methods Mol.Biol.* **721**, 201-213 (2011).
12. S. Kawaoka, S. Katsuma, Y. Tomari, Making piRNAs in vitro. *Methods in molecular biology* **1093**, 35-46 (2014).
13. M. F. Kramer, Stem-loop RT-qPCR for miRNAs. *Curr Protoc Mol Biol* **Chapter 15**, Unit 15 10 (2011).
14. A. I. Saeed, *et al.*, TM4: a free, open-source system for microarray data management and analysis. *Biotechniques* **34**, 374-378 (2003).
15. C. Kemp, *et al.*, Broad RNA interference-mediated antiviral immunity and virus-specific inducible responses in Drosophila. *J Immunol* **190**, 650-658 (2013).
16. B. Czech, *et al.*, An endogenous small interfering RNA pathway in Drosophila. *Nature* **453**, 798-802 (2008).
